# Supplementary material for: Exploration of expanded carbohydrate chemical space to access biological activity using microwave-induced acid condensation of simple sugars
Source: Royal Society of Chemistry journal article supplement (doi:10.1039/d2ra01463g), 2022-01-01

## Supplementary Information

Exploration of expanded carbohydrate chemical space to access biological activity using microwave-induced acid condensation of simple sugars.

JA London, SL Taylor, I Barsukov, A Cartmell and EA Yates

HSQC NMR spectra of products of condensation of:

**Figure S1.** L-arabinose

**Figure S2.** D-galactose

**Figure S3.** L-rhamnose

**Figure S4.** D-arabinose

**Figure S5.** Fuc-CS with some tentative structure assignments.

**Figure S6.** HSQC spectra of two preparations of poly-arabinose demonstrating reproducibility between preparations.

Figure S1. HSQC Poly L-arabinose

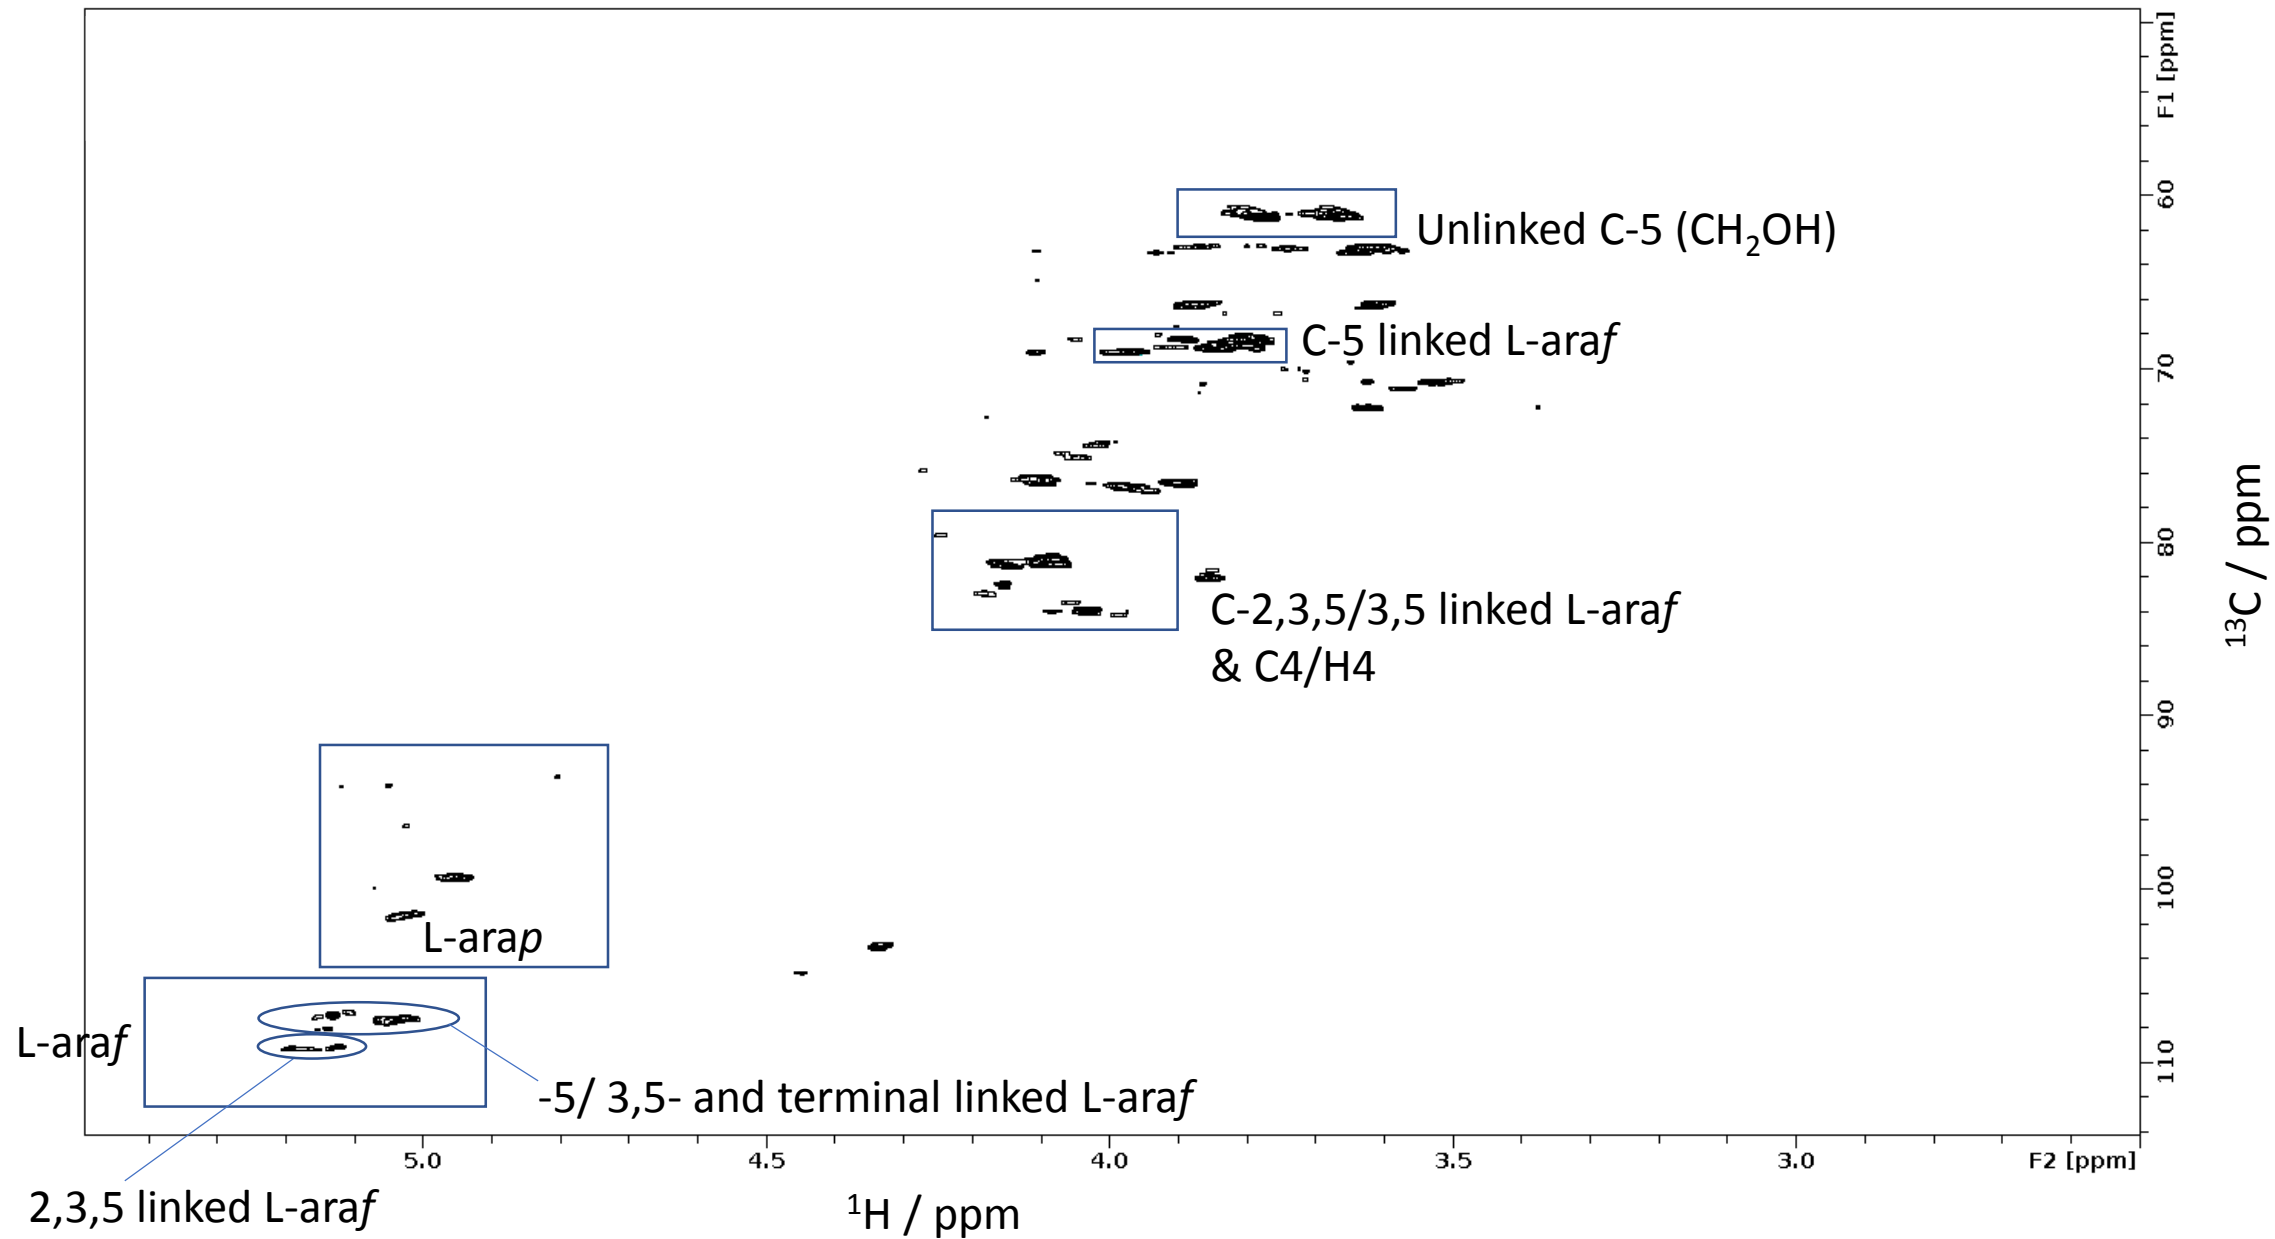

Figure S2. HSQC Poly D-galactose

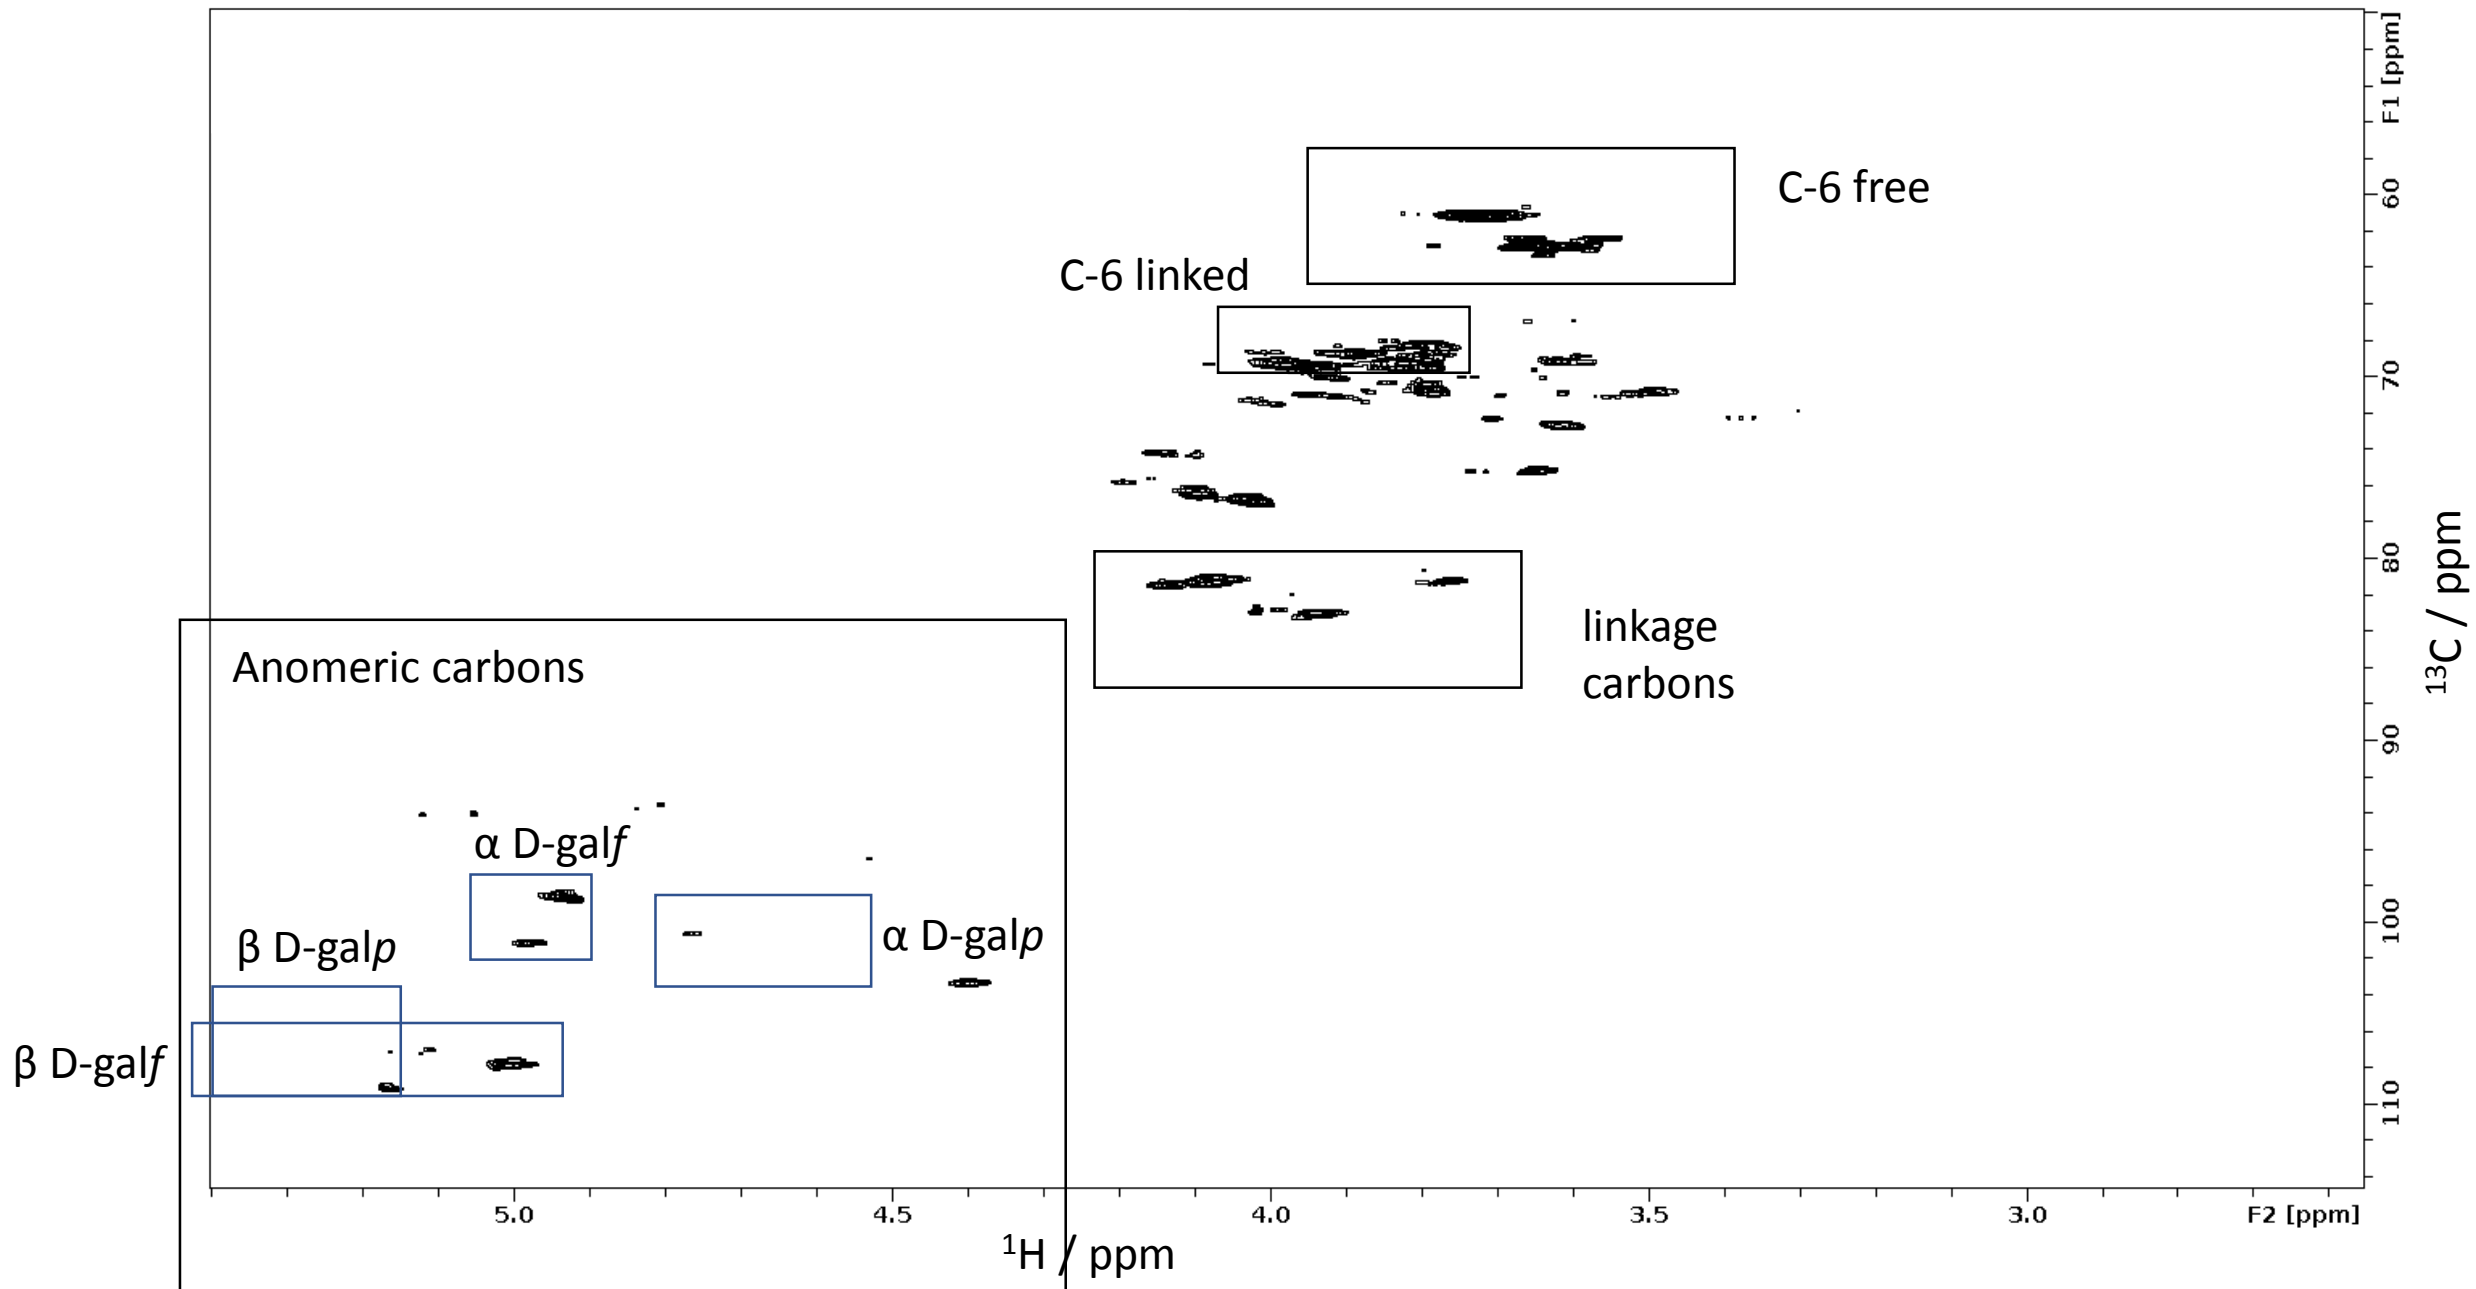

Figure S3. HSQC Poly L-rhamnose

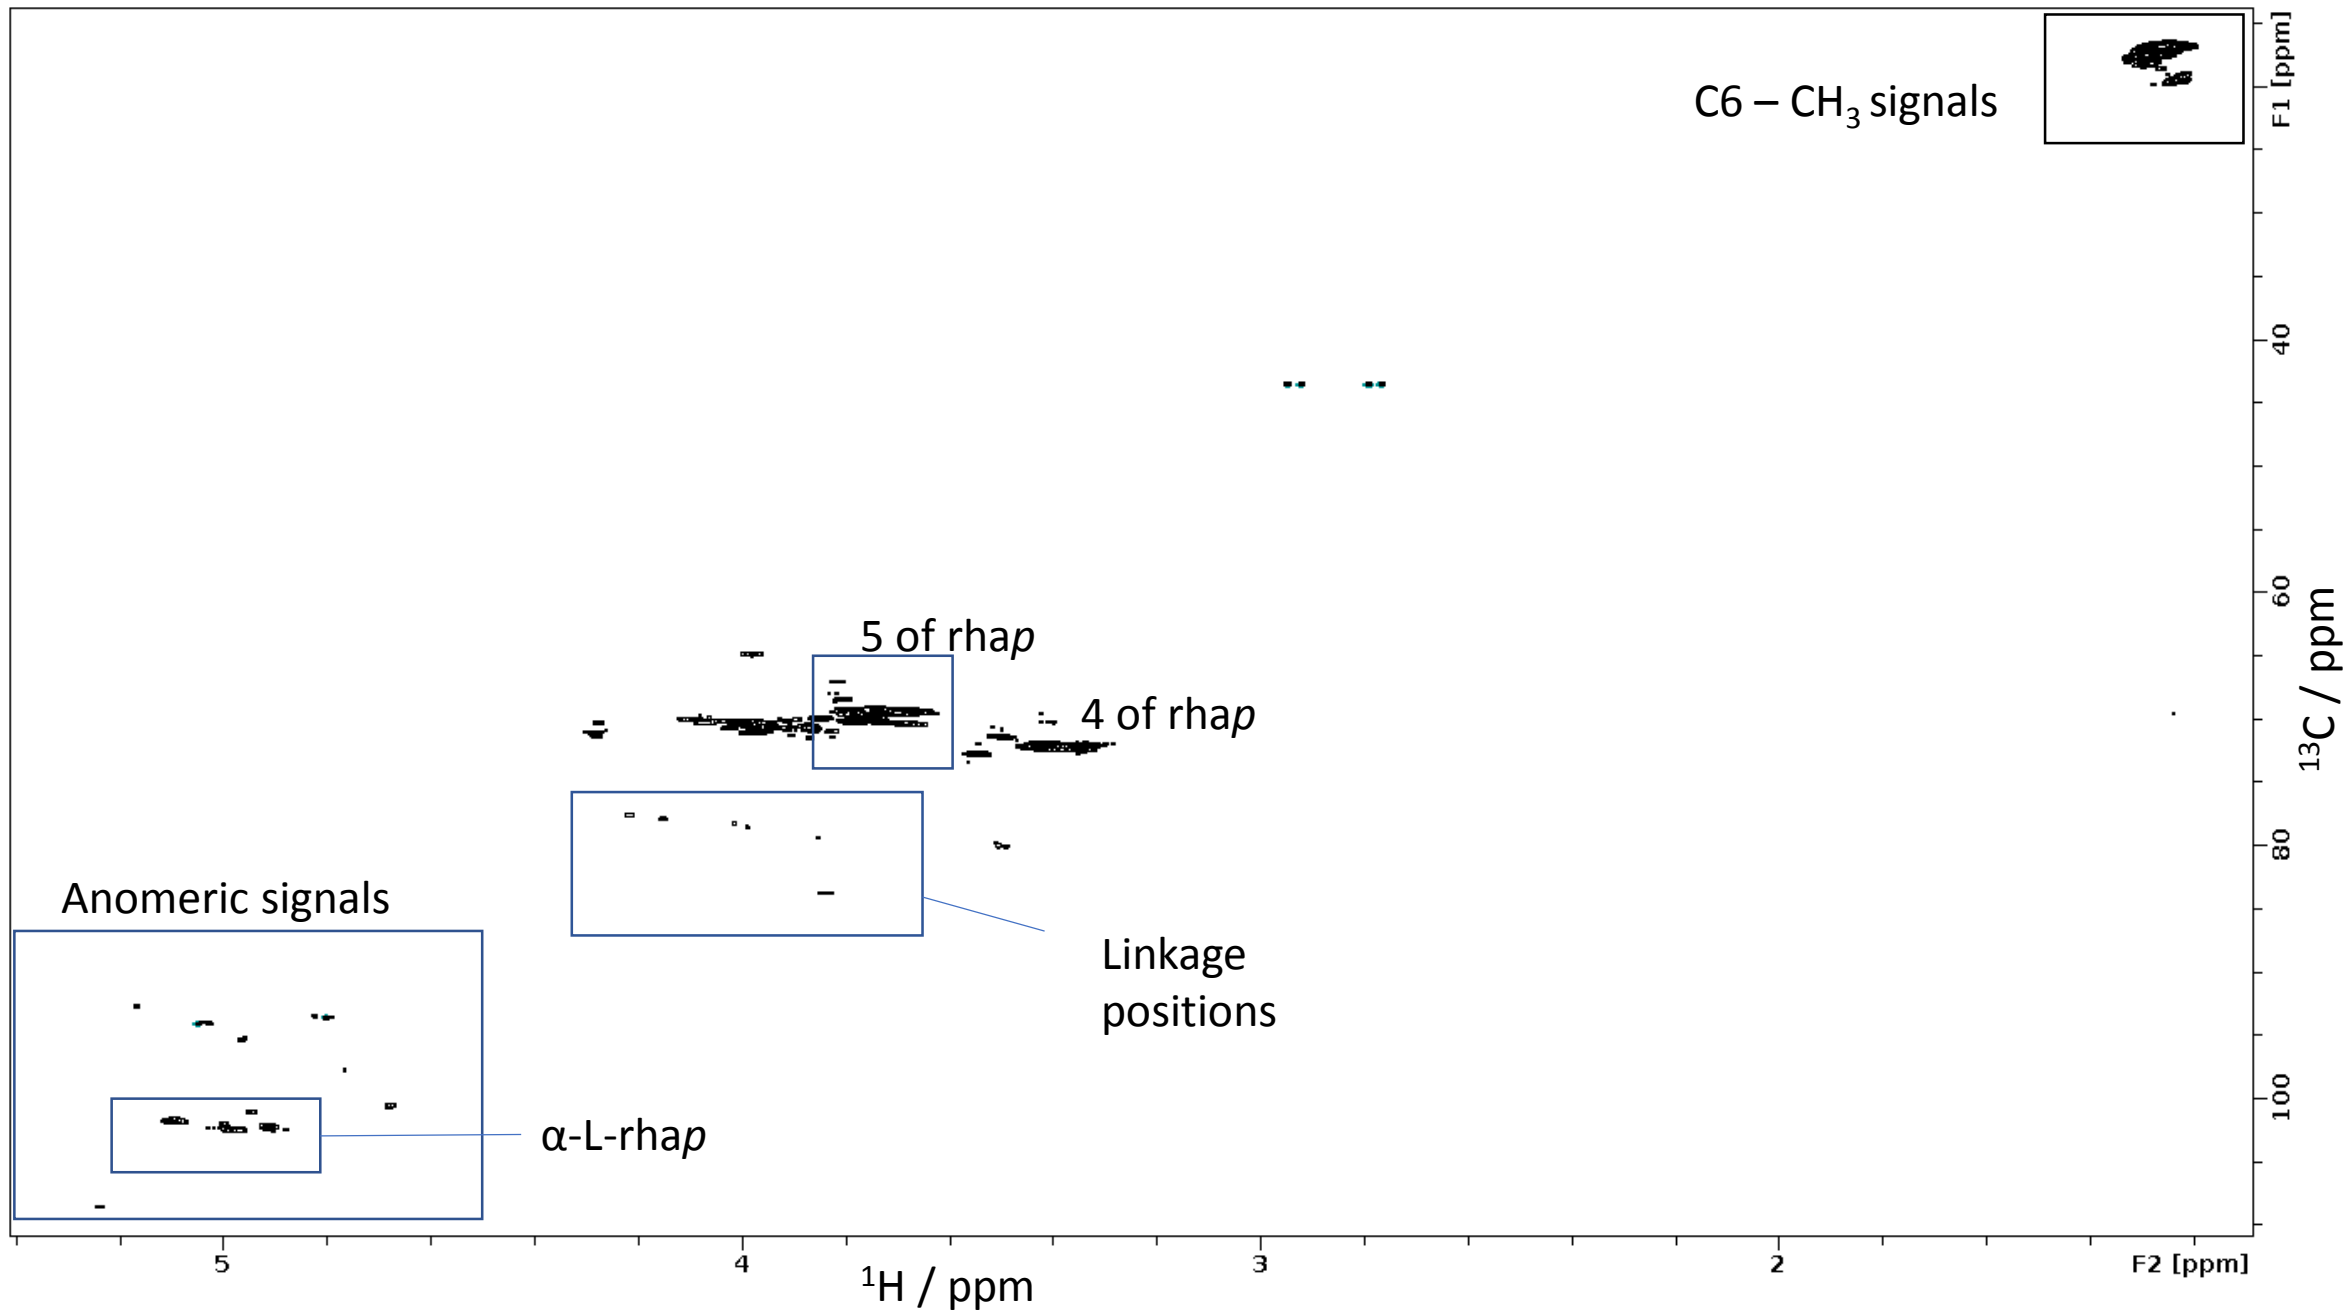

Figure S4. HSQC Poly D-arabinose

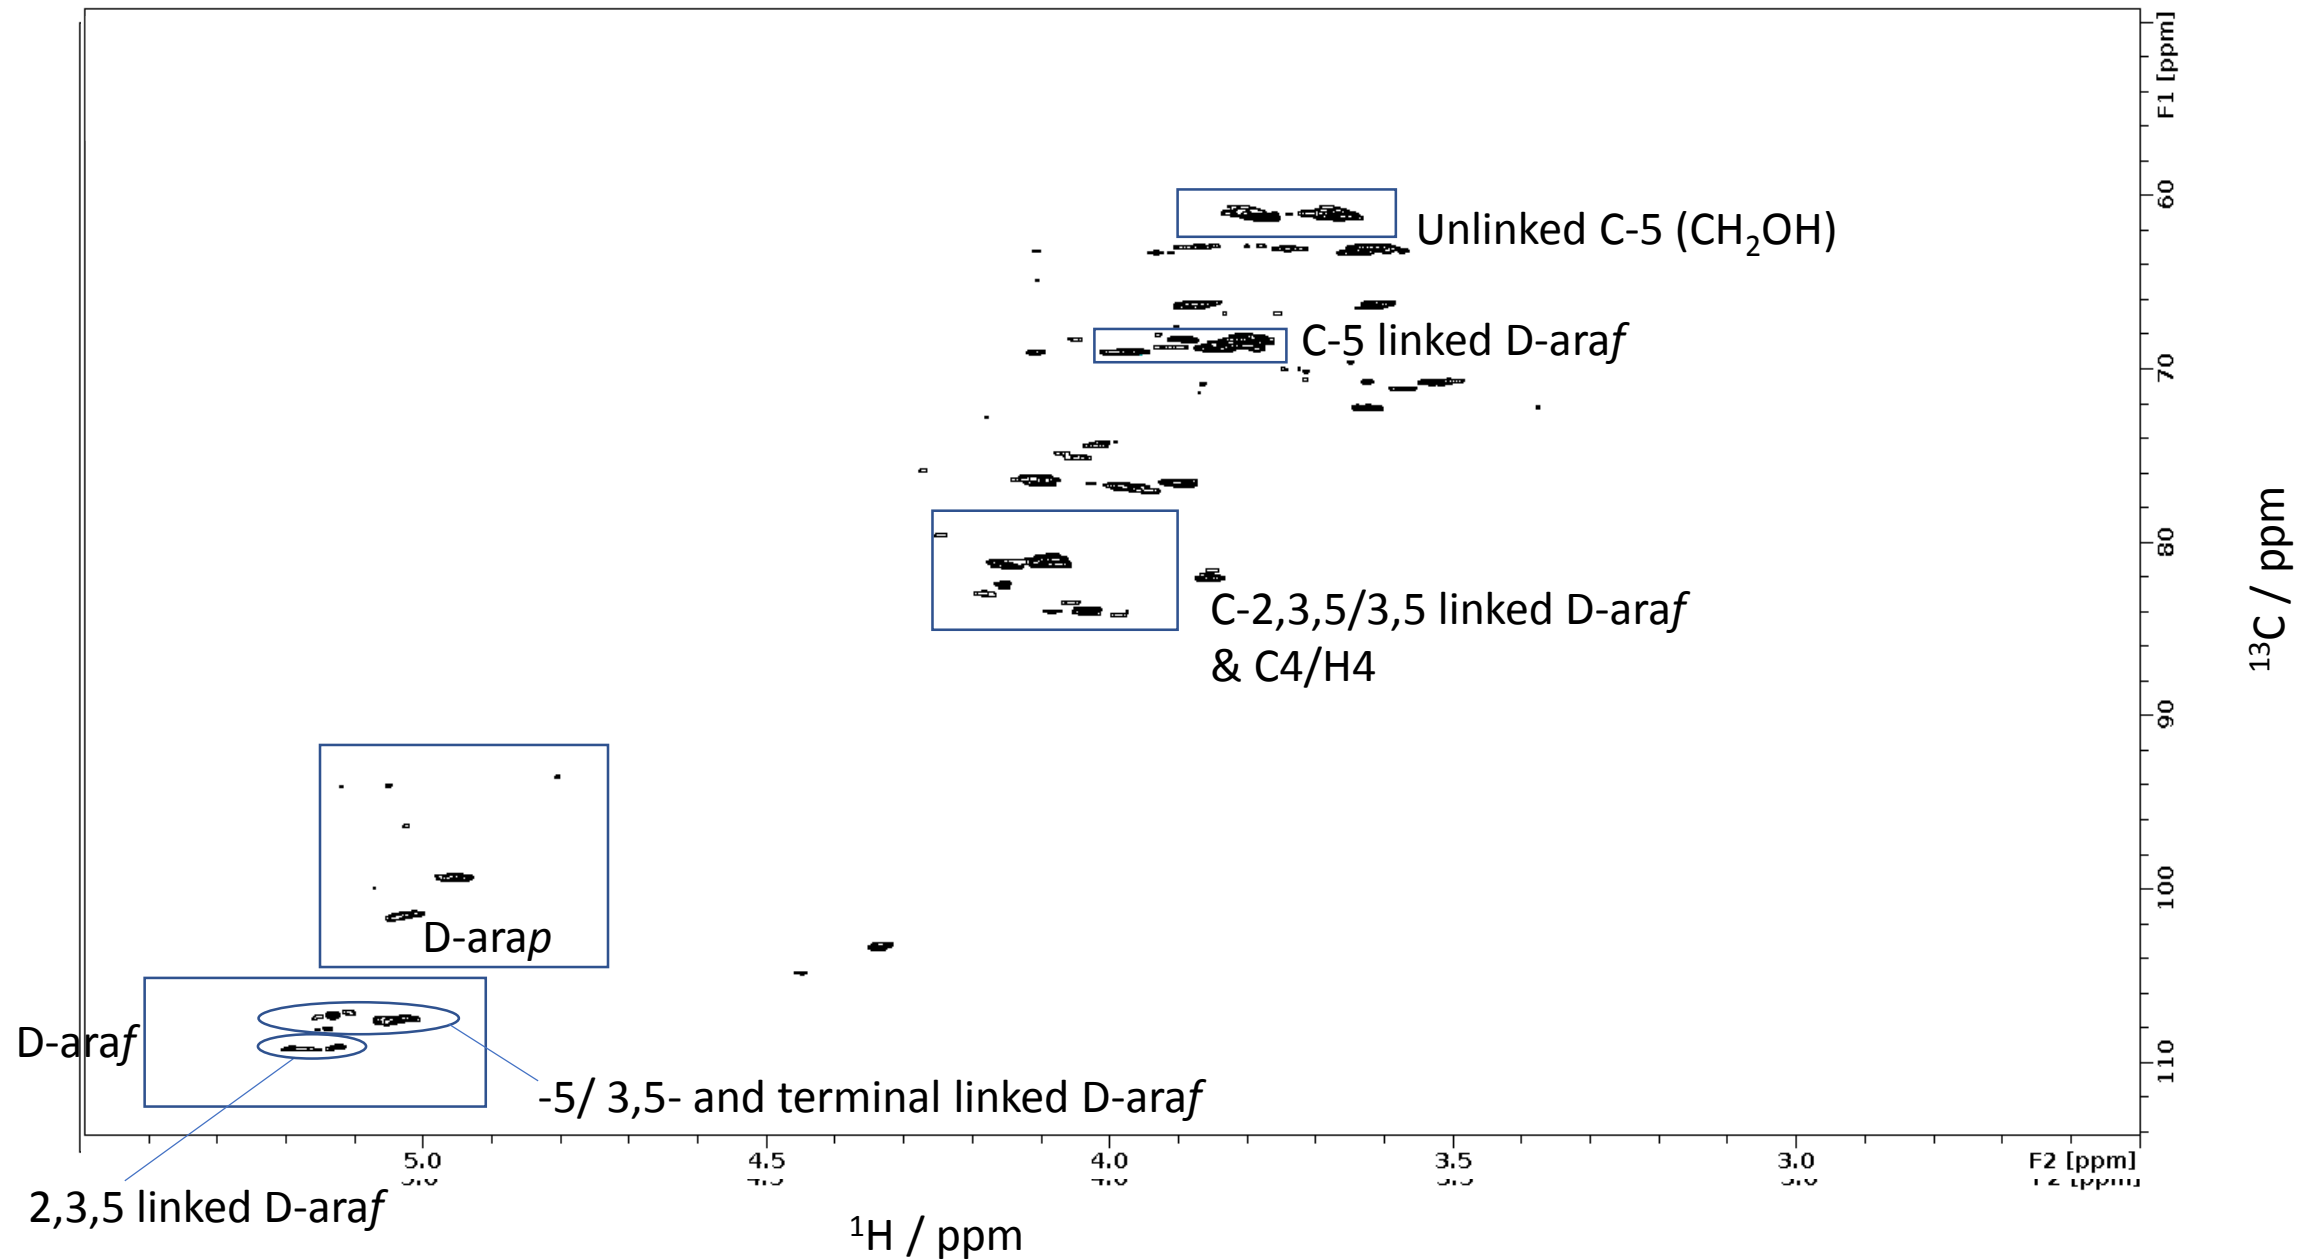

Figure S5. Fucosylated CS

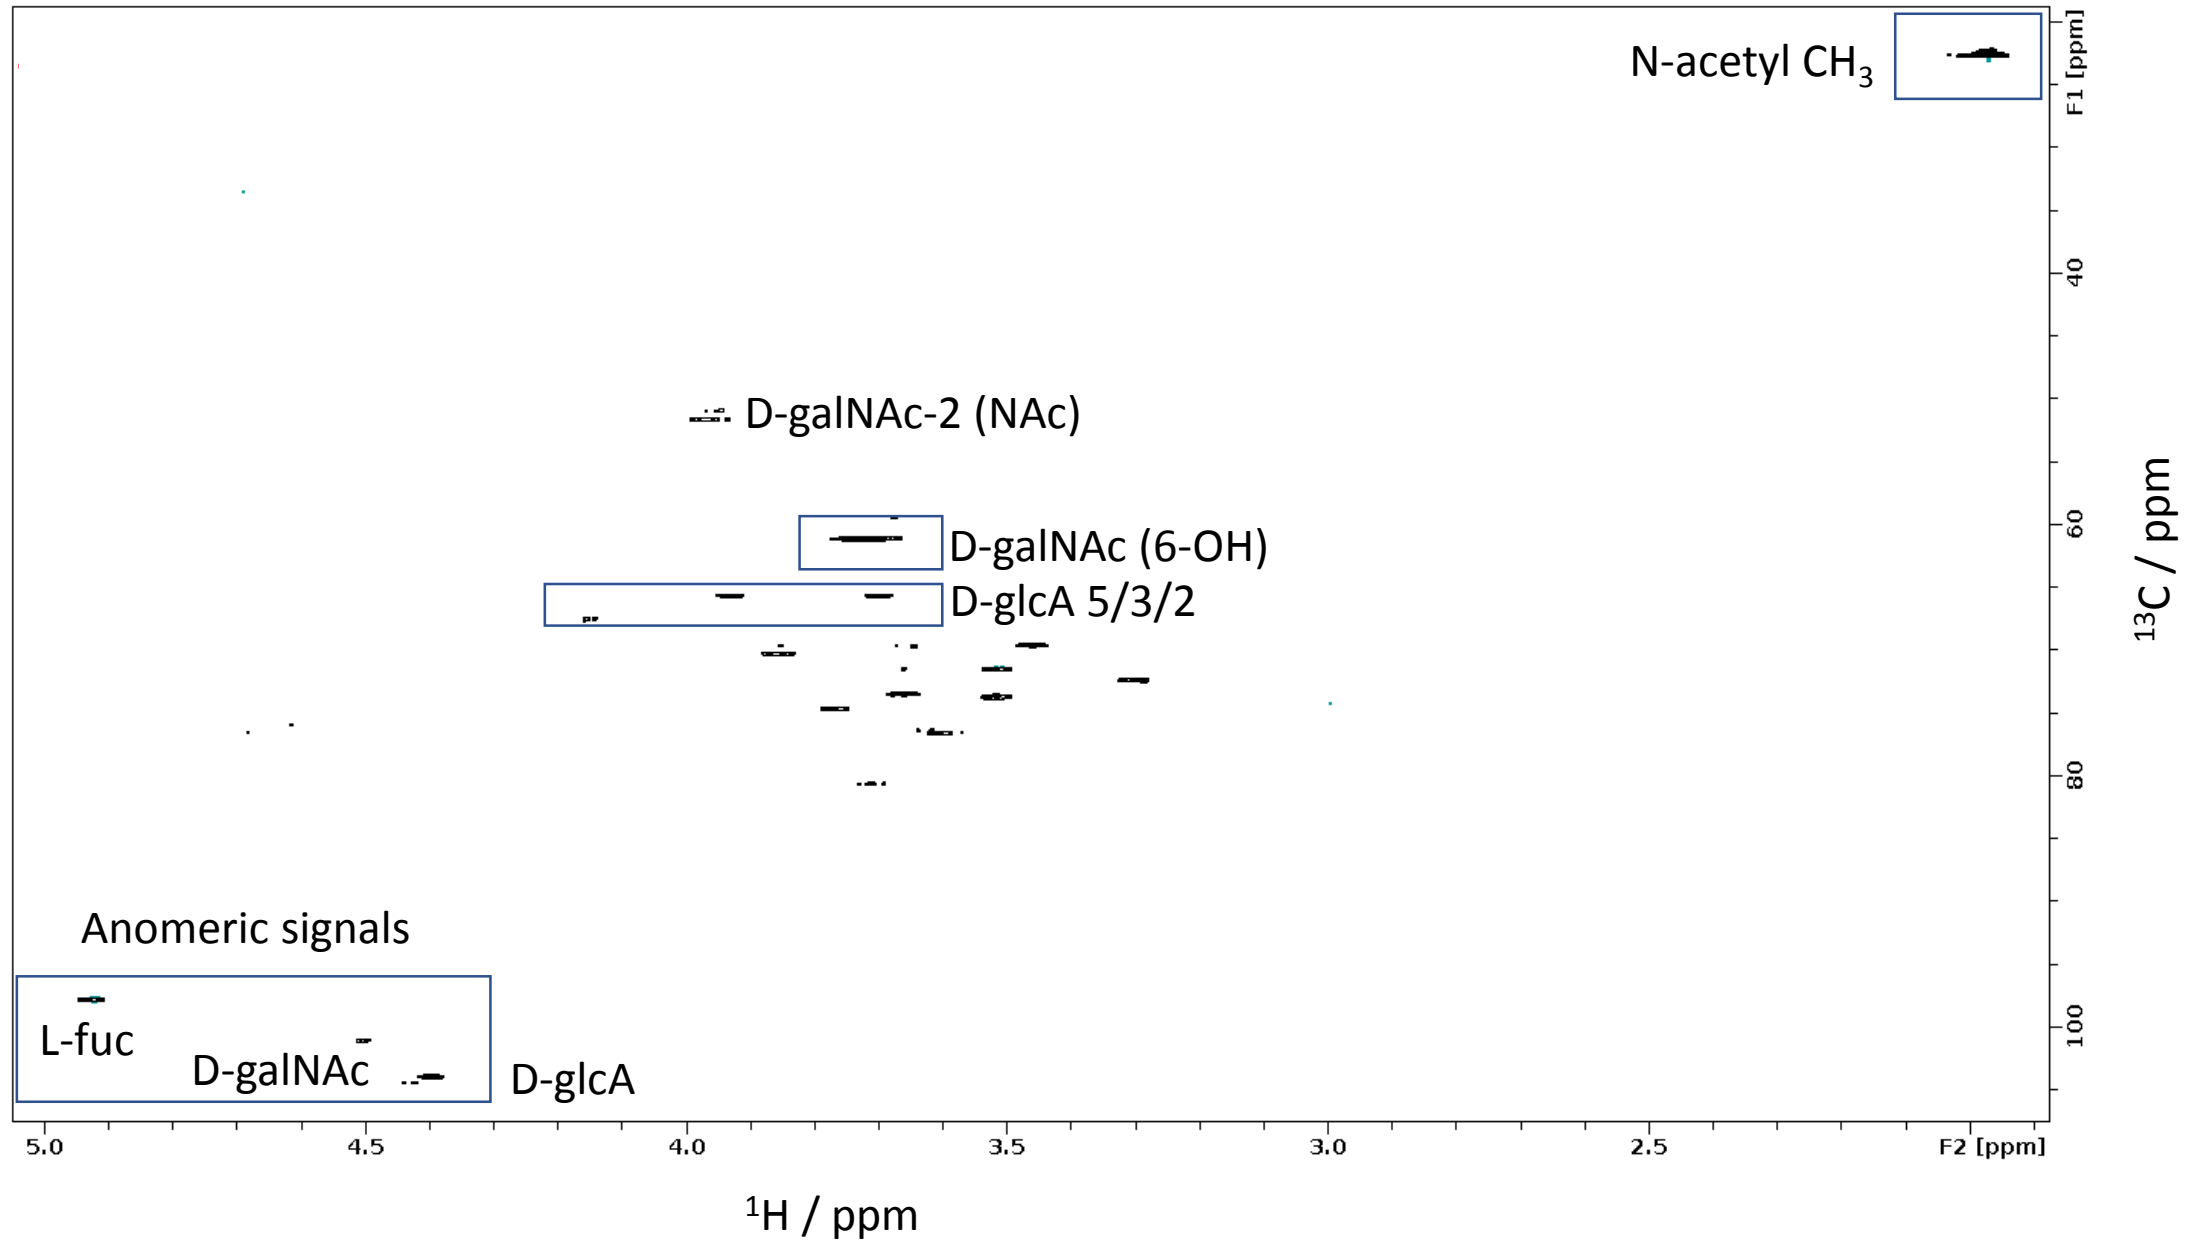

**Figure S6.** HSQC NMR spectra of two preparations of poly-arabinose

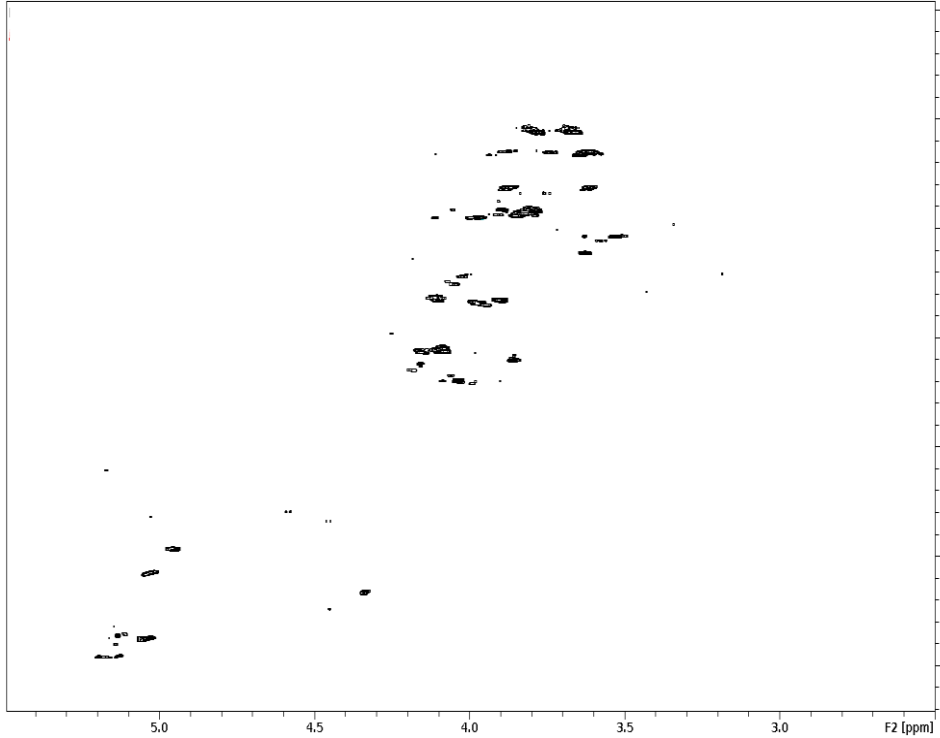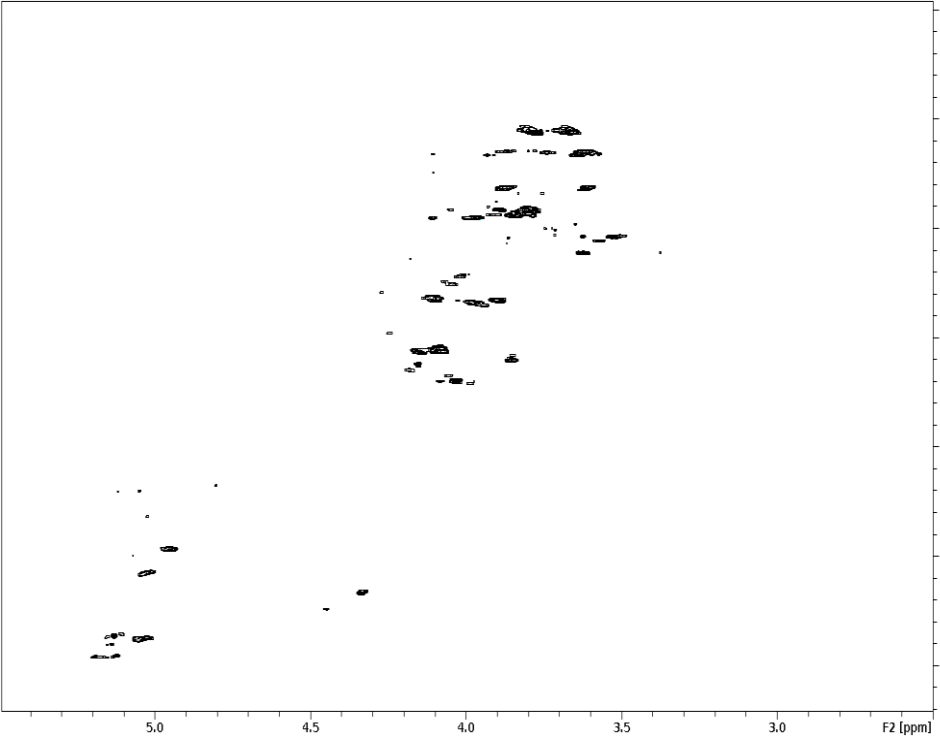

Supplement: d2ra01463g1.pdf [file d2ra01463g1.pdf]
